# Supplementary material for: The Role of Cadaverine Synthesis on Pneumococcal Capsule and Protein Expression
Source: Med Sci (Basel). 2018 Jan 19;6(1):8. doi: 10.3390/medsci6010008 (PMC5872165; doi:10.3390/medsci6010008)
Supplement: Supplementary file 1 [file medsci-06-00008-s001.xlsx]

## Sheet: Table S1
Supplementary Table 1. Proteins identified by mass spectrometry.
Uniprot entry name	Description	Gene
A0A0H2UQY7	Amino acid ABC transporter, amino acid-binding protein	aatB
A0A0H2UNJ7	Acetyl-CoA carboxylase, bitoin carboxyl carrier protein	accB
A0A0H2UNK1	Acetyl-CoA carboxylase, biotin carboxylase	accC
P63413	Acetate kinase	ackA
P0A2W0	Acyl carrier protein	acpP
O05703	Zinc-binding lipoprotein AdcA	adcA
Q97QP9	ATP-dependent helicase/nuclease subunit A	addA
Q97SU1	Adenylate kinase	adk
Q97Q48	Alanine--tRNA ligase	alaS
A0A0H2UQI9	Alpha-acetolactate decarboxylase	aldB
P35592	Oligopeptide-binding protein AliA	aliA
P0A4G0	Oligopeptide-binding protein AliB	aliB
P0A2W8	Alanine racemase	alr
P0A4M9	Oligopeptide transport system permease protein AmiD	amiD
A0A0H2UQT1	Alpha-amylase	amy
P63544	Adenine phosphoribosyltransferase	apt
A0A0H2UN02	Aromatic amino acid aminotransferase	araT
Q97NA4	Arginine deiminase	arcA
P65607	Ornithine carbamoyltransferase, catabolic	arcB
Q54869	Arginine--tRNA ligase	argS
Q9S400	3-phosphoshikimate 1-carboxyvinyltransferase	aroA
P63588	3-dehydroquinate dehydratase	aroD
A0A0H2UQP6	Shikimate kinase	aroK
A0A0H2UPS5	Aspartate-semialdehyde dehydrogenase	asd
Q97NQ0	Aspartate--ammonia ligase	asnA
Q97PR0	Asparagine--tRNA ligase	asnS
A0A0H2UQU3	Aspartate aminotransferase	aspC
Q97ND6	Aspartate--tRNA ligase	aspS
Q97PT4	ATP synthase subunit alpha	atpA
P0A2Y8	ATP synthase subunit a	atpB
P63667	ATP synthase epsilon chain	atpC
Q97PT6	ATP synthase subunit beta	atpD
P0A2Z2	ATP synthase subunit b	atpF
Q97PT5	ATP synthase gamma chain	atpG
P0A2Z4	ATP synthase subunit delta	atpH
A0A0H2UNS8	Putative sensor histidine kinase BlpH	blpH
A0A0H2UQQ7	Bacterocin transport accessory protein	bta
P58313	UTP--glucose-1-phosphate uridylyltransferase	cap4C
A0A0H2UNF8	Capsular polysaccharide biosynthesis protein Cps4J	cap4J
Q97QE4	Carbamoyl-phosphate synthase large chain	carB
Q97PP9	CCA-adding enzyme	cca
A0A0H2URS9	Catabolite control protein A	ccpA
P0A4I5	Sensor protein CiaH	ciaH
P0A4H7	Transcriptional regulatory protein CiaR	ciaR
P54184	Putative competence-damage inducible protein	cinA
P63787	ATP-dependent Clp protease proteolytic subunit	clpP
P63791	ATP-dependent Clp protease ATP-binding subunit ClpX	clpX
Q97PK6	Cytidylate kinase	cmk
Q97PM1	GTP-sensing transcriptional pleiotropic repressor CodY	codY
A0A0H2UNF1	Capsular polysaccharide biosynthesis protein Cps4A	cps4A
A0A0H2UNI5	Capsular polysaccharide biosynthesis protein Cps4E	cps4E
A0A0H2UNF4	Capsular polysaccharide biosynthesis protein Cps4H	cps4H
A0A0H2UNG2	Capsular polysaccharide biosynthesis protein Cps4K	cps4K
A0A0H2UNJ4	UDP-N-acetylglucosamine 2-epimerase	cps4L
Q9AHD4	Tyrosine-protein phosphatase CpsB	cpsB
Q97SJ6	Capsular polysaccharide biosynthesis protein CpsC	cpsC
Q9AHD2	Tyrosine-protein kinase CpsD	cpsD
A0A0H2USL4	Cysteine synthase	cysM
Q97S25	Cysteine--tRNA ligase	cysS
A0A0H2UPH1	D-alanyl-D-alanine carboxypeptidase	dacA
Q97R25	4-hydroxy-tetrahydrodipicolinate synthase	dapA
P63895	4-hydroxy-tetrahydrodipicolinate reductase	dapB
Q97NE6	2,3,4,5-tetrahydropyridine-2,6-dicarboxylate N-acetyltransferase	dapH
P0CB57	D-alanine--D-alanine ligase	ddl
Q9F2F0	Peptide deformylase	def
A0A0H2UR41	Peptide deformylase	def-2
Q97RI6	Phosphopentomutase	deoB
Q97RH2	Deoxyribose-phosphate aldolase	deoC
A0A0H2UPL9	Purine nucleoside phosphorylase DeoD-type	deoD
P64062	GTPase Der	der
Q54796	Glucan 1,6-alpha-glucosidase	dexB
Q54801	Dihydrofolate reductase	dhfR
P0A398	D-alanine--poly(phosphoribitol) ligase subunit 1	dltA
P63957	D-alanine--poly(phosphoribitol) ligase subunit 2	dltC
A0A0H2US53	DltD protein	dltD
A0A0H2URD2	Primosomal protein DnaI	dnaI
P95829	Chaperone protein DnaK	dnaK
O06672	DNA polymerase III subunit beta	dnaN
Q97N50	Energy-coupling factor transporter ATP-binding protein EcfA1	ecfA1
Q97N51	Energy-coupling factor transporter ATP-binding protein EcfA2	ecfA2
A0A0H2USC1	Energy-coupling factor transporter transmembrane protein EcfT	ecfT
P64042	Elongation factor P	efp
P64072	Probable GTP-binding protein EngB	engB
Q97QS2	Enolase	eno
P0A3C3	GTPase Era	era
P0A2X3	Exodeoxyribonuclease	exoA
P35595	PTS system glucose-specific EIICBA component	exp5
P35597	Probable cation-transporting ATPase exp7	exp7
P35598	Putative ABC transporter ATP-binding protein exp8	exp8
Q97RK0	Septation ring formation regulator EzrA	ezrA
A0A0H2UNN0	Malonyl CoA-acyl carrier protein transacylase	fabD
A0A0H2UNK4	3-oxoacyl-[acyl-carrier-protein] synthase 2	fabF
A0A0H2UNR2	3-oxoacyl-[acyl-carrier protein] reductase	fabG
P0A3C5	3-oxoacyl-[acyl-carrier-protein] synthase 3	fabH
A0A0H2UNJ5	Enoyl-(Acyl-carrier-protein) reductase	fabK
P59201	3-hydroxyacyl-[acyl-carrier-protein] dehydratase FabZ	fabZ
P0A4S1	Fructose-bisphosphate aldolase	fba
A0A0H2UQC2	Signal recognition particle protein	ffh
Q97QI2	Formate--tetrahydrofolate ligase	fhs
A0A0H2UPT5	Iron-compound ABC transporter	fhuD
A0A0H2UNZ9	Beta-lactam resistance factor	fibA
A0A0H2UP33	Beta-lactam resistance factor	fibB
A0A0H2UQC6	Flavodoxin	fld
Q97PA6	Methionyl-tRNA formyltransferase	fmt
Q97RI9	Bifunctional protein FolD	folD
P51595	GTP cyclohydrolase 1	folE
Q97R82	Ribosome-recycling factor	frr
A0A0H2UR24	Cell division protein FtsA	ftsA
A0A0H2UPG6	Cell division ABC transporter, ATP-binding protein FtsE	ftsE
O69076	ATP-dependent zinc metalloprotease FtsH	ftsH
A0A0H2UP94	Cell division protein FtsX	ftsX
A0A0H2UQF6	Signal recognition particle receptor FtsY	ftsY
A0A0H2UR32	Cell division protein FtsZ	ftsZ
P64022	Elongation factor G	fusA
A0A0H2UQY4	UDP-glucose 4-epimerase	galE-1
A0A0H2US80	Glyceraldehyde-3-phosphate dehydrogenase	gap
A0A0H2UQ00	Glyceraldehyde-3-phosphate dehydrogenase, NADP-dependent	gapN
Q97SE6	Glutamyl-tRNA(Gln) amidotransferase subunit A	gatA
Q97SE7	Aspartyl/glutamyl-tRNA(Asn/Gln) amidotransferase subunit B	gatB
Q97SE5	Glutamyl-tRNA(Gln) amidotransferase subunit C	gatC
A0A0H2UQJ7	Glutamate dehydrogenase	gdhA
A0A0H2UP34	Glucokinase	gki
Q97QS7	Glucose-1-phosphate adenylyltransferase	glgC
A0A0H2UQ67	Glycogen biosynthesis protein GlgD	glgD
Q97PP4	Phosphoglucosamine mutase	glmM
Q97SQ9	Glutamine--fructose-6-phosphate aminotransferase [isomerizing]	glmS
Q97R46	Bifunctional protein GlmU	glmU
A0A0H2UNQ5	Glutamine synthetase, type I	glnA
A0A0H2UPN2	Lactoylglutathione lyase	gloA
Q97NG1	Glutamate--tRNA ligase	gltX
Q97R16	Serine hydroxymethyltransferase	glyA
Q97PW5	Glycine--tRNA ligase alpha subunit	glyQ
Q97PW6	Glycine--tRNA ligase beta subunit	glyS
Q97PA3	Guanylate kinase	gmk
A0A0H2UNG6	6-phosphogluconate dehydrogenase, decarboxylating	gnd
A0A0H2UPG3	Glutathione reductase	gor
P0A3Y3	2,3-bisphosphoglycerate-dependent phosphoglycerate mutase	gpmA
Q97NF1	Glycerol-3-phosphate dehydrogenase [NAD(P)+]	gpsA
Q97SI9	Cell cycle protein GpsB	gpsB
Q97PT2	Transcription elongation factor GreA	greA
P0A335	60 kDa chaperonin	groL
Q97NV3	10 kDa chaperonin	groS
Q97S73	Protein GrpE	grpE
A0A0H2URG7	Glycosyltransferase Gtf1	gtf1
A0A0H2URT4	Sucrose phosphorylase	gtfA
P64297	GMP synthase [glutamine-hydrolyzing]	guaA
A0A0H2USM1	Inosine-5'-monophosphate dehydrogenase	guaB
Q97QG5	GMP reductase	guaC
P72524	DNA gyrase subunit A	gyrA
A0A0H2UPZ1	Release factor glutamine methyltransferase	hemK
Q97NC9	Histidine--tRNA ligase	hisS
A0A0H2UQH0	Homoserine dehydrogenase	hom
Q97TC4	Hypoxanthine-guanine phosphoribosyltransferase	hpt
A0A0H2UNU2	Type I restriction-modification system, M subunit	hsdM
P64403	33 kDa chaperonin	hslO
Q97QD6	Protease HtpX homolog	htpX
A0A0H2UPZ3	DNA-binding protein HU	hup
P0CB61	Isoleucine--tRNA ligase	ileS
Q97SD7	Ketol-acid reductoisomerase	ilvC
P65159	Dihydroxy-acid dehydratase	ilvD
A0A0H2UPG4	Branched-chain-amino-acid aminotransferase	ilvE
P65121	Translation initiation factor IF-1	infA
Q97S57	Translation initiation factor IF-2	infB
P65144	Translation initiation factor IF-3	infC
A0A0H2UQ53	Geranyltranstransferase	ispA
Q97QE5	2-C-methyl-D-erythritol 4-phosphate cytidylyltransferase	ispD
Q97QL0	Galactose-6-phosphate isomerase subunit LacA	lacA
Q97QL1	Galactose-6-phosphate isomerase subunit LacB	lacB
Q97QL3	Tagatose 1,6-diphosphate aldolase	lacD
A0A0H2UPN6	Lactose phosphotransferase system repressor	lacR-1
A0A0H2UP66	Lactate oxidase	lctO-2
P0A3M9	L-lactate dehydrogenase	ldh
A0A0H2UQI3	LemA protein	lemA
O07344	Signal peptidase I	lepB
Q97SS0	Leucine--tRNA ligase	leuS
A0A0H2UQB5	LicC protein	licC
A0A0H2UQI0	LicD2 protein	licD2
A0A0H2UQH6	LicD3 protein	licD3
Q97QT2	DNA ligase	ligA
A0A0H2UP95	Branched-chain amino acid ABC transporter, ATP-binding protein	livF
A0A0H2UPD6	Branched-chain amino acid ABC transporter, amino acid-binding protein	livJ
A0A0H2UPY0	Adhesion lipoprotein	lmb
P65334	S-ribosylhomocysteine lyase	luxS
A0A0H2UPL6	Saccharopine dehydrogenase	lys9
A0A0H2URT3	Diaminopimelate decarboxylase	lysA
Q97RS9	Lysine--tRNA ligase	lysS
P06653	Autolysin	lytA
A0A0H2XFA2	Lysozyme	lytC
P29849	Maltodextrin phosphorylase	malP
P0A3Q0	4-alpha-glucanotransferase	malQ
P59213	Maltose/maltodextrin-binding protein	malX
A0A0H2UPF1	Mannose-6-phosphate isomerase	manA
A0A0H2UN99	PTS system, mannose-specific IIAB components	manL
A0A0H2UNA0	PTS system, mannose-specific IIC component	manM
A0A0H2UQ40	Methionine aminopeptidase	map
A0A0H2UNG3	Mid-cell-anchored protein Z	mapZ
P67580	Methionine--tRNA ligase	metG
Q97RN9	S-adenosylmethionine synthase	metK
Q97T09	Methionine import ATP-binding protein MetN	metN
A0A0H2UMR6	Transcription-repair-coupling factor	mfd
Q97RW5	tRNA dimethylallyltransferase	miaA
Q97T38	tRNA-specific 2-thiouridylase MnmA	mnmA
Q97R24	tRNA modification GTPase MnmE	mnmE
Q97T36	tRNA uridine 5-carboxymethylaminomethyl modification enzyme MnmG	mnmG
A0A0H2US81	Cell shape-determining protein MreC	mreC
A0A0H2UPY7	Large conductance mechanosensitive channel protein MscL	mscL
A0A0H2UQW6	Sugar ABC transporter, ATP-binding protein	msmK
P0A3Q9	Peptide methionine sulfoxide reductase MsrA/MsrB 1	msrAB1
P65443	Peptide methionine sulfoxide reductase MsrA/MsrB 2	msrAB2
A0A0H2UPP7	5'-methylthioadenosine/S-adenosylhomocysteine nucleosidase 2	mtf
Q97NQ4	UDP-N-acetylglucosamine 1-carboxyvinyltransferase 1	murA1
Q97QW6	UDP-N-acetylglucosamine 1-carboxyvinyltransferase 2	murA2
P65466	UDP-N-acetylenolpyruvoylglucosamine reductase	murB
Q97PS8	UDP-N-acetylmuramate--L-alanine ligase	murC
Q97RU8	UDP-N-acetylmuramoylalanine--D-glutamate ligase	murD
Q97PS1	UDP-N-acetylmuramoyl-L-alanyl-D-glutamate--L-lysine ligase	murE
A0A0H2URC3	UDP-N-acetylmuramoyl-tripeptide--D-alanyl-D-alanine ligase	murF
P0CB60	UDP-N-acetylglucosamine--N-acetylmuramyl-(pentapeptide) pyrophosphoryl-undecaprenol N-acetylglucosamine transferase	murG
A0A0H2UNP0	Diphosphomevalonate decarboxylase	mvaD
A0A0H2UNK6	Mevalonate kinase	mvaK1
A0A0H2UR69	Hydroxymethylglutaryl-CoA synthase	mvaS
A0A0H2URZ9	Nicotinate-nucleotide pyrophosphorylase	nadC
P65504	Probable nicotinate-nucleotide adenylyltransferase	nadD
P65508	NH(3)-dependent NAD(+) synthetase	nadE
A0A0H2URV3	N-acetylglucosamine-6-phosphate deacetylase	nagA
Q97Q16	Glucosamine-6-phosphate deaminase	nagB
P65520	Putative N-acetylmannosamine-6-phosphate 2-epimerase 2	nanE2
P65536	Nucleoside diphosphate kinase	ndk
A0A0H2UQZ4	NADH oxidase	nox
A0A0H2UN67	Anaerobic ribonucleoside-triphosphate reductase	nrdD
A0A0H2UQ44	Ribonucleoside-diphosphate reductase	nrdE
A0A0H2UQ95	Ribonucleoside-diphosphate reductase subunit beta	nrdF
A0A0H2UQ32	NrdH-redoxin	nrdH
A0A0H2UPS0	Carboxynorspermidine decarboxylase	nspC
A0A0H2UP18	Transcription termination/antitermination protein NusA	nusA
P65582	N utilization substance protein B homolog	nusB
A0A0H2URU6	Transcription termination/antitermination protein NusG	nusG
Q97QW8	GTPase Obg	obg
P18791	Oligopeptide-binding protein	oppA
P18766	Oligopeptide transport ATP-binding protein	oppB
P0A2U8	Oligopeptide transport ATP-binding protein	oppD
P0A4M7	Oligopeptide transport system permease protein	oppF
A0A0H2URX1	Penicillin-binding protein 1B	pbp1B
A0A0H2URT5	Penicillin-binding protein 2A	pbp2A
P14677	Penicillin-binding protein 2x	pbpX
A0A0H2UQJ0	Choline kinase	pck
P65678	Pyrrolidone-carboxylate peptidase 1	pcp1
A0A0H2UPX1	DNA helicase	pcrA
Q97PX2	Pyridoxal 5'-phosphate synthase subunit PdxS	pdxS
Q97PX3	Pyridoxal 5'-phosphate synthase subunit PdxT	pdxT
P0A3M5	Penicillin-binding protein 2B	penA
A0A0H2URN4	Glutamyl-aminopeptidase	pepA
A0A0H2UNE1	Aminopeptidase C	pepC
A0A0H2UPP8	Oligoendopeptidase F	pepF
A0A0H2UPC7	Aminopeptidase N	pepN
A0A0H2UR08	Endopeptidase O	pepO
A0A0H2UR67	Proline dipeptidase	pepQ
A0A0H2UN95	Aminopeptidase PepS	pepS
Q97R31	Peptidase T	pepT
A0A0H2UP69	Dipeptidase	pepV
Q97RC8	Xaa-Pro dipeptidyl-peptidase	pepX
Q97QZ1	Toxin PezT	pezT
Q97RC6	ATP-dependent 6-phosphofructokinase	pfkA
A0A0H2UNL5	Formate acetyltransferase	pfl
A0A0H2URX3	Pyruvate formate-lyase-activating enzyme	pflA
A0A0H2UQQ3	Peptidoglycan N-acetylglucosamine deacetylase A	pgdA
Q97NG0	Glucose-6-phosphate isomerase	pgi
Q97S89	Phosphoglycerate kinase	pgk
A0A0H2UQR8	Phosphoglucomutase	pgm
A0A0H2UQG9	Prephenate dehydratase	pheA
Q97S36	Phenylalanine--tRNA ligase alpha subunit	pheS
Q97S34	Phenylalanine--tRNA ligase beta subunit	pheT
A0A0H2UQW8	PhnA protein	phnA
P0A3Y7	Phosphate-specific transport system accessory protein PhoU homolog	phoU
Q97TA6	Phosphate acyltransferase	plsX
P0A4P9	Glycerol-3-phosphate acyltransferase	plsY
P0C2J9	Pneumolysin	ply
Q97S28	Polyribonucleotide nucleotidyltransferase	pnp
P59199	DNA polymerase I	polA
Q97SQ2	DNA polymerase III PolC-type	polC
Q04707	Penicillin-binding protein 1A	ponA
P65755	Probable manganese-dependent inorganic pyrophosphatase	ppaC
Q97QX6	Phosphoenolpyruvate carboxylase	ppc
Q97R20	Peptide chain release factor 1	prfA
Q2MGI2	Peptide chain release factor 2	prfB
Q97SE4	Peptide chain release factor 3	prfC
A0A0H2URF2	Primosomal protein N'	priA
Q97R95	Glutamate 5-kinase	proB
Q97SR1	Proline--tRNA ligase	proS
A0A0H2URQ9	Choline transporter	proV
A0A0H2URM9	Choline transporter	proWX
P65239	Ribose-phosphate pyrophosphokinase 1	prs1
P65241	Ribose-phosphate pyrophosphokinase 2	prs2
Q97R51	Foldase protein PrsA	prsA
P0A4G2	Manganese ABC transporter substrate-binding lipoprotein	psaA
A0A0H2UR84	Manganese ABC transporter, ATP-binding protein	psaB
A0A0H2UMZ8	Pneumococcal surface protein A	pspA
P63373	Phosphate import ATP-binding protein PstB 1	pstB1
Q97Q34	Phosphate import ATP-binding protein PstB 2	pstB2
P0A2V8	Phosphate import ATP-binding protein PstB 3	pstB3
A0A0H2USC9	Phosphate transport system permease protein	pstC
Q97Q31	Phosphate-binding protein PstS 1	pstS1
P0C2M5	Phosphate-binding protein PstS 2	pstS2
A0A0H2UQ52	Phosphate acetyltransferase	pta
Q97TD1	Peptidyl-tRNA hydrolase	pth
A0A0H2UQ34	Phosphocarrier protein HPr	ptsH
A0A0H2UQ90	Phosphoenolpyruvate-protein phosphotransferase	ptsI
P65887	Adenylosuccinate synthetase	purA
A0A0H2UMU6	Adenylosuccinate lyase	purB
P65832	Pur operon repressor	purR
Q9AHT6	Pneumococcal vaccine antigen A	pvaA
A0A0H2UPJ3	Pyruvate kinase	pyk
A0A0H2UPM4	Pyrimidine-nucleoside phosphorylase	pyn
Q97QE2	Aspartate carbamoyltransferase	pyrB
Q97QN4	Dihydroorotase	pyrC
Q9X9S0	Probable dihydroorotate dehydrogenase A (fumarate)	pyrDA
P0CB78	Orotate phosphoribosyltransferase	pyrE
P0CB75	Orotidine 5'-phosphate decarboxylase	pyrF
Q97S93	CTP synthase	pyrG
Q97R83	Uridylate kinase	pyrH
P65946	Bifunctional protein PyrR	pyrR
Q97Q15	S-adenosylmethionine:tRNA ribosyltransferase-isomerase	queA
A0A0H2URJ7	Sugar ABC transporter, sugar-binding protein	rafE
Q97S56	Ribosome-binding factor A	rbfA
P0A451	Protein RecA	recA
A0A0H2UP28	Single-stranded-DNA-specific exonuclease RecJ	recJ
A0A0H2XDS8	Transketolase	recP-1
P0CB76	Recombination protein RecR	recR
P66040	6,7-dimethyl-8-ribityllumazine synthase	ribH
Q97RM5	Ribosome maturation factor RimM	rimM
Q97S61	Ribosome maturation factor RimP	rimP
A0A0H2URG9	Pseudouridine synthase	rluB
A0A0H2UPM0	Pseudouridine synthase	rluD
A0A0H2UNZ5	Ribonuclease J	rnj
Q97RW2	Ribonuclease Z	rnz
A0A0H2US58	Ribulose-phosphate 3-epimerase	rpe
Q97RI7	Ribose-5-phosphate isomerase A	rpiA
P66095	50S ribosomal protein L1	rplA
Q97SV2	50S ribosomal protein L2	rplB
Q97SV5	50S ribosomal protein L3	rplC
Q97SV4	50S ribosomal protein L4	rplD
Q97SV1	50S ribosomal protein L5	rplE
Q97SU7	50S ribosomal protein L6	rplF
P66320	50S ribosomal protein L9	rplI
P66050	50S ribosomal protein L10	rplJ
Q97RZ6	50S ribosomal protein L11	rplK
P0A471	50S ribosomal protein L7/L12	rplL
A0A0H2UNF0	50S ribosomal protein L13	rplM
P0A473	50S ribosomal protein L14	rplN
Q97SU3	50S ribosomal protein L15	rplO
P0A475	50S ribosomal protein L16	rplP
Q97ST6	50S ribosomal protein L17	rplQ
Q97SU6	50S ribosomal protein L18	rplR
Q97QC6	50S ribosomal protein L19	rplS
P66112	50S ribosomal protein L20	rplT
Q97QU4	50S ribosomal protein L21	rplU
P61182	50S ribosomal protein L22	rplV
Q97SV3	50S ribosomal protein L23	rplW
P60629	50S ribosomal protein L24	rplX
P66135	50S ribosomal protein L27	rpmA
P66155	50S ribosomal protein L28	rpmB
P0A483	50S ribosomal protein L29	rpmC
Q97SU4	50S ribosomal protein L30	rpmD
P66200	50S ribosomal protein L31 type B	rpmE2
Q97R59	50S ribosomal protein L33 1	rpmG1
Q97NL4	50S ribosomal protein L33 2	rpmG2
P61360	50S ribosomal protein L33 type 3	rpmG3
P66278	50S ribosomal protein L35	rpmI
P0A495	50S ribosomal protein L36	rpmJ
P66708	DNA-directed RNA polymerase subunit alpha	rpoA
Q97NQ7	DNA-directed RNA polymerase subunit beta	rpoB
Q97NQ8	DNA-directed RNA polymerase subunit beta'	rpoC
P66717	Probable DNA-directed RNA polymerase subunit delta	rpoE
P66730	DNA-directed RNA polymerase subunit omega	rpoZ
A0A0H2UPG5	Ribosomal protein S1	rpsA
Q97N56	30S ribosomal protein S2	rpsB
P0A4C3	30S ribosomal protein S3	rpsC
P66565	30S ribosomal protein S4	rpsD
P66581	30S ribosomal protein S5	rpsE
P66602	30S ribosomal protein S6	rpsF
Q97SQ4	30S ribosomal protein S7	rpsG
P66632	30S ribosomal protein S8	rpsH
Q97SN4	30S ribosomal protein S9	rpsI
P66339	30S ribosomal protein S10	rpsJ
P66359	30S ribosomal protein S11	rpsK
P0A4A7	30S ribosomal protein S12	rpsL
P66392	30S ribosomal protein S13	rpsM
P66419	30S ribosomal protein S14	rpsN
Q97PI9	30S ribosomal protein S15	rpsO
P66444	30S ribosomal protein S16	rpsP
P0A4B3	30S ribosomal protein S17	rpsQ
P66472	30S ribosomal protein S18	rpsR
P0A4B5	30S ribosomal protein S19	rpsS
Q97RH7	30S ribosomal protein S20	rpsT
P66524	30S ribosomal protein S21	rpsU
A0A0H2USD8	rRNA (Guanine-N1-)-methyltransferase	rrmA
Q97P97	Ribosomal silencing factor RsfS	rsfS
P67684	Putative ribosome biogenesis GTPase RsgA	rsgA
Q97NN5	Ribosomal RNA small subunit methyltransferase A	rsmA
Q97QD4	Ribosomal RNA small subunit methyltransferase G	rsmG
P0CB58	Ribosomal RNA small subunit methyltransferase H	rsmH
Q97SY4	Holliday junction ATP-dependent DNA helicase RuvA	ruvA
A0A0H2URG2	Invertase	scrB
A0A0H2UR62	Fructokinase	scrK
A0A0H2UR82	Sucrose operon repressor	scrR
A0A0H2UN60	L-serine dehydratase, iron-sulfur-dependent, alpha subunit	sdhA
Q97PD6	Protein translocase subunit SecA 1	secA1
A0A0H2UNE3	Protein translocase subunit SecY	secY
Q97SG0	Serine--tRNA ligase	serS
A0A0H2US11	Ascorbate specific PTS, EIIB component	sgaB2
A0A0H2USF7	Ascorbate specific PTS, EIIC component	sgaT2
P0A4I9	RNA polymerase sigma factor SigA	sigA
P0A4J6	Superoxide dismutase [Mn]	sodA
A0A0H2UMS4	Putative deoxyuridine 5'triphosphate nucleotidohydrolase	SP_0021
A0A0H2UMS5	Carbonic anhydrase	SP_0024
A0A0H2UMW1	Uncharacterized protein	SP_0033
Q97TA9	UPF0324 membrane protein SP_0034	SP_0034
A0A0H2UMU7	Transcriptional regulator, GntR family	SP_0058
A0A0H2UMU8	PTS system, IIB component	SP_0061
A0A0H2UMZ4	Phosphorylase, Pnp/Udp family	SP_0075
A0A0H2UMX0	Potassium uptake protein, Trk family	SP_0079
A0A0H2UMY0	ABC transporter, substrate-binding protein	SP_0092
P67330	UPF0176 protein SP_0095	SP_0095
A0A0H2UMX9	Conserved domain protein	SP_0097
A0A0H2UMY5	Uncharacterized protein	SP_0098
A0A0H2UN16	Uncharacterized protein	SP_0099
A0A0H2UN55	Uncharacterized protein	SP_0100
A0A0H2UMZ0	Putative capsular polysaccharide biosynthesis protein	SP_0103
Q97T34	UPF0356 protein SP_0122	SP_0122
A0A0H2UN08	Uncharacterized protein	SP_0127
A0A0H2UN58	ABC transporter, substrate-binding protein	SP_0148
A0A0H2UN92	Lipoprotein	SP_0149
A0A0H2UN21	Peptidase, M20/M25/M40 family	SP_0150
A0A0H2UN26	Uncharacterized protein	SP_0157
Q97T03	Putative NrdI-like protein	SP_0158
A0A0H2UN46	MccC family protein	SP_0182
A0A0H2UN91	Uncharacterized protein	SP_0184
A0A0H2UN49	Peptidase M24 family protein	SP_0187
A0A0H2UN57	Uncharacterized protein	SP_0189
A0A0H2UNC7	Uncharacterized protein	SP_0191
Q97SX1	UPF0297 protein SP_0192	SP_0192
P67382	UPF0237 protein SP_0238	SP_0238
Q97ST4	UPF0210 protein SP_0239	SP_0239
A0A0H2UN71	Phosphoglycerate mutase family protein	SP_0240
Q97SR2	Putative zinc metalloprotease SP_0263	SP_0263
A0A0H2UND4	Putative oxidoreductase	SP_0267
A0A0H2UNG8	PTS system, mannose-specific IID component	SP_0282
A0A0H2UNB1	Alcohol dehydrogenase, zinc-containing	SP_0285
A0A0H2UNE6	Cof family protein	SP_0286
A0A0H2UNL3	Putative ATP-dependent Clp protease, ATP-binding subunit	SP_0338
Q97SJ8	UPF0371 protein SP_0341	SP_0341
A0A0H2UNF7	Putative membrane protein	SP_0354
A0A0H2UNJ0	Uncharacterized protein	SP_0355
A0A0H2UNM3	Putative polysaccharide transporter	SP_0356
A0A0H2UNK2	DNA-binding response regulator	SP_0376
A0A0H2UNI4	Cell division protein ZapA	SP_0404
A0A0H2UNJ6	Alkyl hydroperoxide reductase AhpD	SP_0409
A0A0H2UNM5	Aspartokinase	SP_0413
A0A0H2UNJ9	Enoyl-CoA hydratase/isomerase family protein	SP_0415
A0A0H2UNJ1	Transcriptional regulator, MarR family	SP_0416
A0A0H2UNK7	Uncharacterized protein	SP_0434
A0A0H2UNN8	Uncharacterized protein	SP_0442
A0A0H2UNS2	Uncharacterized protein	SP_0443
A0A0H2UNL1	Uncharacterized protein	SP_0451
A0A0H2UNL6	Amino acid ABC transporter, ATP-binding protein	SP_0452
A0A0H2UNP9	Amino acid ABC transporter, amino acid-binding protein/permease protein	SP_0453
A0A0H2UNT1	Uncharacterized protein	SP_0454
A0A0H2UNT6	Cell wall surface anchor family protein	SP_0462
A0A0H2UNM7	Cell wall surface anchor family protein	SP_0463
A0A0H2UNQ9	Putative sortase	SP_0466
A0A0H2UNN9	Potassium uptake protein, Trk family	SP_0480
A0A0H2UNR9	Uncharacterized protein	SP_0520
A0A0H2UNS0	HIT family protein	SP_0521
A0A0H2UNS3	ABC transporter, ATP-binding protein	SP_0522
A0A0H2UNY6	Uncharacterized protein	SP_0549
A0A0H2UNW2	Uncharacterized protein	SP_0554
A0A0H2UNW4	Uncharacterized protein	SP_0563
A0A0H2UNZ6	Cell filamentation protein Fic-related protein	SP_0571
A0A0H2UNX9	Acetyltransferase, GNAT family	SP_0590
A0A0H2UNZ7	Uncharacterized protein	SP_0619
A0A0H2UP38	Nitroreductase family protein	SP_0622
A0A0H2UP05	Uncharacterized protein	SP_0627
A0A0H2UP45	HIT family protein	SP_0628
A0A0H2UP74	Uncharacterized protein	SP_0629
A0A0H2UP55	Serine protease, subtilase family	SP_0641
A0A0H2UP17	Putative PTS system, IIB component	SP_0646
A0A0H2UP20	Putative PTS system, IIC component	SP_0647
A0A0H2UP73	Chorismate binding enzyme	SP_0665
A0A0H2UP36	Uncharacterized protein	SP_0670
A0A0H2UPA3	Uncharacterized protein	SP_0673
A0A0H2UP37	Oxidoreductase, short chain dehydrogenase/reductase family	SP_0675
A0A0H2UP39	Putative transcriptional regulator	SP_0676
A0A0H2UP83	Uncharacterized protein	SP_0678
A0A0H2UP44	Elongation factor Tu family protein	SP_0681
Q97RQ6	DegV domain-containing protein SP_0742	SP_0742
A0A0H2UPE2	Putative acetoin utilization protein AcuB	SP_0754
A0A0H2UPF2	ABC transporter, ATP-binding protein	SP_0770
A0A0H2UPH6	Peptidyl-prolyl cis-trans isomerase	SP_0771
A0A0H2UPF7	UPF0109 protein SP_0776	SP_0776
A0A0H2XFG1	Ribonucleoside-diphosphate reductase, alpha subunit, truncation	SP_0780
A0A0H2UPI5	Uncharacterized protein	SP_0785
A0A0H2UPB8	ABC transporter, ATP-binding protein	SP_0786
A0A0H2UPB4	Uncharacterized protein	SP_0787
A0A0H2UPI9	Oxidoreductase, aldo/keto reductase family	SP_0791
A0A0H2UPB7	Oxidoreductase, short chain dehydrogenase/reductase family	SP_0793
A0A0H2UPD0	Uncharacterized protein	SP_0801
A0A0H2UPD2	Putative 4-methyl-5(B-hydroxyethyl)-thiazole monophosphate biosynthesis protein	SP_0804
A0A0H2UPC8	Hydrolase, haloacid dehalogenase-like family	SP_0805
A0A0H2UPD4	Uncharacterized protein	SP_0816
A0A0H2UPE1	Uncharacterized protein	SP_0822
A0A0H2UPE4	Amino acid ABC transporter, ATP-binding protein	SP_0824
A0A0H2UPE3	Purine nucleoside phosphorylase	SP_0831
A0A0H2UPF3	Lipoprotein	SP_0845
A0A0H2UPF8	Sugar ABC transporter, ATP-binding protein	SP_0846
A0A0H2UPG2	Uncharacterized protein	SP_0861
A0A0H2UPG8	Uncharacterized protein	SP_0864
A0A0H2UPG7	ABC transporter, ATP-binding protein	SP_0867
A0A0H2UPH0	Uncharacterized protein	SP_0868
A0A0H2UPH3	Cysteine desulfurase	SP_0869
A0A0H2UPN1	NifU family protein	SP_0870
A0A0H2UPP2	Uncharacterized protein	SP_0871
A0A0H2UPP9	Tagatose-6-phosphate kinase	SP_0876
A0A0H2UPH7	PTS system, fructose specific IIABC components	SP_0877
A0A0H2UPI4	Aminotransferase, class-V	SP_0880
A0A0H2UPK1	Uncharacterized protein	SP_0899
A0A0H2UPT3	N-carbamoylputrescine amidase	SP_0922
A0A0H2UPK8	Cof family protein	SP_0923
A0A0H2UPM3	Uncharacterized protein	SP_0946
A0A0H2UPN4	Acetyltransferase, GNAT family	SP_0950
A0A0H2UPW0	O-methyltransferase	SP_0980
A0A0H2UPP4	Cys-tRNA(Pro)/Cys-tRNA(Cys) deacylase	SP_0985
A0A0H2UPQ2	Uncharacterized protein	SP_0987
A0A0H2UPW5	MutT/nudix family protein	SP_0989
A0A0H2UPX4	Uncharacterized protein	SP_0990
A0A0H2UPQ9	Exonuclease	SP_0993
A0A0H2UPR5	Thioredoxin family protein	SP_1000
A0A0H2UPR0 [2]	Cluster of Uncharacterized protein	SP_1003
A0A0H2UPR3	Uncharacterized protein	SP_1004
P67530	Probable tautomerase SP_1017	SP_1017
A0A0H2UPZ4	Uncharacterized protein	SP_1027
A0A0H2UPS9	Iron-compound ABC transporter, ATP-binding protein	SP_1035
A0A0H2UQ12	Putative hydrolase	SP_1044
Q97QZ6	Putative lipid kinase SP_1045	SP_1045
A0A0H2UPV6	Uncharacterized protein	SP_1069
A0A0H2UPW4	Uncharacterized protein	SP_1074
A0A0H2UPW9	Glycosyl transferase, group 1	SP_1076
A0A0H2UPW6	Glutamine amidotransferase, class I	SP_1089
A0A0H2UQ47	Uncharacterized protein	SP_1093
A0A0H2UPX3	Uncharacterized protein	SP_1096
P67266	Nucleoid-associated protein SP_1102	SP_1102
A0A0H2UPY9	Uncharacterized protein	SP_1106
A0A0H2UPY5	Riboflavin biosynthesis protein	SP_1110
Q97QT7	DegV domain-containing protein SP_1112	SP_1112
A0A0H2UPY6	Putative pullulanase	SP_1118
A0A0H2UPZ2	Uncharacterized protein	SP_1127
A0A0H2UQ79	Uncharacterized protein	SP_1140
A0A0H2UQ83	Ribosome biogenesis GTPase A	SP_1155
A0A0H2UQ30	Lipoate--protein ligase	SP_1160
A0A0H2UQ86	Dihydrolipoyl dehydrogenase	SP_1161
A0A0H2UQ21	Putative acetoin dehydrogenase, E1 component, beta subunit	SP_1163
A0A0H2UQ88	Hydrolase, haloacid dehalogenase-like family	SP_1171
A0A0H2UQ39	Conserved domain protein	SP_1174
A0A0H2UQ89	Conserved domain protein	SP_1175
A0A0H2UQB9	Conserved domain protein	SP_1213
A0A0H2UQC3	Uncharacterized protein	SP_1218
A0A0H2UQC4	Putative type II restriction endonuclease	SP_1221
A0A0H2UQ68	DNA-binding response regulator	SP_1227
A0A0H2UQ78	Uncharacterized protein	SP_1230
A0A0H2UQD2	Flavoprotein	SP_1231
A0A0H2UQF2	Acetyltransferase, GNAT family	SP_1236
A0A0H2UQ91	Amino acid ABC transporter, amino acid-binding protein/permease protein	SP_1241
A0A0H2UQ97	Amino acid ABC transporter, ATP-binding protein	SP_1242
A0A0H2UQG7	Cof family protein	SP_1245
A0A0H2UQ94	Cof family protein	SP_1246
A0A0H2UQB7	Uncharacterized protein	SP_1280
A0A0H2UQI8	Cof family protein	SP_1291
A0A0H2UQC7	Putative chorismate mutase	SP_1296
A0A0H2UQD4	DHH subfamily 1 protein	SP_1298
A0A0H2UQG0	Amidohydrolase family protein	SP_1356
A0A0H2UQG8	Conserved domain protein	SP_1363
A0A0H2UQH2	Psr protein	SP_1368
Q97Q59	UPF0342 protein SP_1372	SP_1372
A0A0H2UQQ1	ABC transporter, ATP-binding protein	SP_1381
A0A0H2UQI6	Uncharacterized protein	SP_1384
A0A0H2UQR1	Amino acid ABC transporter, amino acid-binding protein	SP_1394
A0A0H2UQU1	Phosphate-specific transport system accessory protein PhoU	SP_1395
A0A0H2UQJ9	Hydrolase, haloacid dehalogenase-like family	SP_1407
A0A0H2UQJ1	Putative acyl-ACP thioesterase	SP_1408
A0A0H2UQV1	Uncharacterized protein	SP_1410
A0A0H2UQK6	Uncharacterized protein	SP_1411
A0A0H2UQS6	Nicotinate phosphoribosyltransferase	SP_1421
A0A0H2UQL3	Cluster of Peptidase, U32 family	SP_1429
A0A0H2UQX9	Cof family protein	SP_1451
A0A0H2UQY3	RNA methyltransferase, TrmH family, group 3	SP_1457
A0A0H2UQV7	Amino acid ABC transporter, permease protein	SP_1461
A0A0H2UQY9	Uncharacterized protein	SP_1462
A0A0H2UQP5	Acetyltransferase, GNAT family	SP_1464
A0A0H2UQN3	Uncharacterized protein	SP_1465
A0A0H2UQP9	Putative oxidoreductase	SP_1471
A0A0H2UQN8	Putative oxidoreductase	SP_1472
Q97PW7	UPF0291 protein SP_1473	SP_1473
A0A0H2UQQ5	Oxidoreductase, aldo/keto reductase family	SP_1478
A0A0H2UR04	Oxidoreductase, Gfo/Idh/MocA family	SP_1482
A0A0H2UQR5	Putative glycerol uptake facilitator protein	SP_1491
A0A0H2UR17	Amino acid ABC transporter, ATP-binding protein	SP_1501
A0A0H2UQS3	Amino acid ABC transporter, permease protein	SP_1502
A0A0H2UR22	Uncharacterized protein	SP_1506
A0A0H2UQS8	Uncharacterized protein	SP_1518
A0A0H2UR26	Conserved domain protein	SP_1522
A0A0H2UQT4	Snf2 family protein	SP_1523
A0A0H2UQU0	Uncharacterized protein	SP_1531
A0A0H2UR36	Cof family protein/peptidyl-prolyl cis-trans isomerase, cyclophilin type	SP_1538
A0A0H2UQT2	Conserved domain protein	SP_1546
A0A0H2UR15	Uncharacterized protein	SP_1548
A0A0H2UQV0	Glutathione S-transferase family protein	SP_1550
A0A0H2UQU8	Cation-transporting ATPase, E1-E2 family	SP_1551
A0A0H2UR20	ABC transporter, ATP-binding protein	SP_1553
Q97PP6	DegV domain-containing protein SP_1557	SP_1557
A0A0H2UQV3	Uncharacterized protein	SP_1558
A0A0H2UQV5	Uncharacterized protein	SP_1560
Q97PP0	Ferredoxin--NADP reductase	SP_1563
Q97PN8	Putative gluconeogenesis factor	SP_1565
Q97PN7	Nucleotide-binding protein SP_1566	SP_1566
A0A0H2UR52	Endoribonuclease L-PSP	SP_1567
A0A0H2UQW0	Non-heme iron-containing ferritin	SP_1572
A0A0H2UR34	Isochorismatase family protein	SP_1583
A0A0H2UQW7	Oxidoreductase, pyridine nucleotide-disulfide, class I	SP_1588
A0A0H2UQV8	Mur ligase family protein	SP_1589
A0A0H2UR39	Uncharacterized protein	SP_1590
A0A0H2UR72	Putative phosphomethylpyrimidine kinase	SP_1598
A0A0H2UR49	Uncharacterized protein	SP_1604
A0A0H2UR54	SAM-dependent methyltransferase	SP_1610
A0A0H2UQY6	Acyltransferase family protein	SP_1624
A0A0H2UR94	DNA-binding response regulator	SP_1633
A0A0H2UQZ8	Rrf2 family protein	SP_1636
A0A0H2UR73	Uncharacterized protein	SP_1637
A0A0H2UR99	Iron-dependent transcriptional regulator	SP_1638
A0A0H2UR40	Putative phosphosugar-binding transcriptional regulator	SP_1674
A0A0H2UR28	Putative N-acetylneuraminate lyase	SP_1676
A0A0H2URD1	Sugar ABC transporter, sugar-binding protein	SP_1683
A0A0H2URE3	Phospho-2-dehydro-3-deoxyheptonate aldolase	SP_1700
A0A0H2UR58	Phospho-2-dehydro-3-deoxyheptonate aldolase	SP_1701
A0A0H2UR56	Nitroreductase family protein	SP_1710
A0A0H2UR70	Transcriptional regulator, GntR family	SP_1714
A0A0H2UR55	ABC transporter, ATP-binding protein	SP_1715
A0A0H2UR60	Uncharacterized protein	SP_1716
A0A0H2UR66	3-hydroxy-3-methylglutaryl coenzyme A reductase	SP_1726
A0A0H2UR71	Putative phosphatase	SP_1733
A0A0H2UR75	Uncharacterized protein	SP_1743
A0A0H2UR80	Isochorismatase family protein	SP_1745
A0A0H2URF8	Uncharacterized protein	SP_1746
A0A0H2URH9	Uncharacterized protein	SP_1748
A0A0H2URJ6	Glycosyl transferase, family 8	SP_1766
A0A0H2UR93	Uncharacterized protein	SP_1768
A0A0H2UR98	Conserved domain protein	SP_1775
A0A0H2URC2	Putative oligoendopeptidase F	SP_1780
A0A0H2URA2	Ribosomal RNA small subunit methyltransferase E	SP_1781
A0A0H2URC5	Uncharacterized protein	SP_1793
A0A0H2URE2	Uncharacterized protein	SP_1802
A0A0H2URD5	Putative general stress protein 24	SP_1804
Q97P39	UPF0337 protein SP_1805	SP_1805
A0A0H2URE1	Uncharacterized protein	SP_1810
A0A0H2URM1	Putative capsular polysaccharide biosynthesis protein	SP_1837
A0A0H2URH6	ABC transporter, ATP-binding/permease protein	SP_1840
A0A0H2URM6	Alcohol dehydrogenase, zinc-containing	SP_1855
A0A0H2URJ3	Uncharacterized protein	SP_1862
A0A0H2URG0	Transcriptional regulator, MarR family	SP_1863
A0A0H2URI0	Uncharacterized protein	SP_1864
A0A0H2URK5	Iron-compound ABC transporter, iron-compound-binding protein	SP_1872
A0A0H2URI7	CBS domain protein	SP_1878
A0A0H2URP5	Phosphoesterase	SP_1879
P64310	Non-canonical purine NTP pyrophosphatase	SP_1880
P67293	UPF0154 protein SP_1882	SP_1882
A0A0H2URS6	Putative dextran glucosidase DexS	SP_1883
A0A0H2URK8	Trehalose PTS system, IIABC components	SP_1884
A0A0H2URK4	Oxidoreductase, short chain dehydrogenase/reductase family	SP_1909
A0A0H2URR3	Uncharacterized protein	SP_1910
A0A0H2URU3	Putative thioredoxin	SP_1911
P67186	Probable transcriptional regulatory protein SP_1922	SP_1922
A0A0H2URV2	Uncharacterized protein	SP_1924
A0A0H2URM7	Uncharacterized protein	SP_1925
A0A0H2URJ8	Uncharacterized protein	SP_1926
A0A0H2US14	Putative transcriptional regulator	SP_1942
A0A0H2URN5	Uncharacterized protein	SP_1944
A0A0H2URP2	CBS domain protein	SP_1963
A0A0H2URQ4	Uncharacterized protein	SP_1967
A0A0H2URX8	Thiamine pyrophosphokinase	SP_1982
A0A0H2URQ2	ABC transporter, ATP-binding protein	SP_1987
A0A0H2URR8	Putative immunity protein	SP_1988
A0A0H2URY1	Putative transcriptional regulator PlcR	SP_1989
A0A0H2URT8	Putative hydrolase	SP_1991
A0A0H2URS4	Aminotransferase, class I	SP_1994
A0A0H2US68	Universal stress protein	SP_1996
A0A0H2URQ8	Putative L-asparaginase	SP_1998
A0A0H2URT2	Aldehyde-alcohol dehydrogenase	SP_2026
A0A0H2URX0	Uncharacterized protein	SP_2027
A0A0H2US08	Phosphotyrosine protein phosphatase	SP_2028
A0A0H2USA3	Putative jag protein	SP_2040
A0A0H2URU7	Uncharacterized protein	SP_2045
A0A0H2URX2	Alcohol dehydrogenase, zinc-containing	SP_2055
A0A0H2URY7	Uncharacterized protein	SP_2057
A0A0H2XDT6	LysM domain protein	SP_2063
A0A0H2URV7	Hydrolase, haloacid dehalogenase-like family	SP_2064
A0A0H2US37	ABC transporter, ATP-binding/permease protein	SP_2073
A0A0H2USC5	ABC transporter, ATP-binding/permease protein	SP_2075
A0A0H2US03	Uncharacterized protein	SP_2093
Q97NE7	N-acetyldiaminopimelate deacetylase	SP_2096
A0A0H2US09	Cation-transporting ATPase, EI-E2 family	SP_2101
A0A0H2US49	Uncharacterized protein	SP_2102
A0A0H2URY8	Transcriptional regulator, BglG family	SP_2131
A0A0H2US28	Uncharacterized protein	SP_2132
A0A0H2US83	SPFH domain/Band 7 family	SP_2156
A0A0H2USJ2	tRNA-dihydrouridine synthase	SP_2189
A0A0H2US66	Putative ABC transporter, substrate-binding protein	SP_2197
A0A0H2US72	Uncharacterized protein	SP_2202
A0A0H2USK7	DHH subfamily 1 protein	SP_2205
A0A0H2USB7	Uncharacterized protein	SP_2209
A0A0H2US74	Uncharacterized protein	SP_2223
A0A0H2US79	ABC transporter, ATP-binding protein	SP_2230
A0A0H2US63	Serine protease	SP_2239
Q54970	Pyruvate oxidase	spxB
P66854	Single-stranded DNA-binding protein	ssb
Q97PA9	Serine/threonine-protein kinase StkP	stkP
P05382	Dihydropteroate synthase	sulA
Q97R22	Thymidine kinase	tdk
A0A0H2UPN9	Tellurite resistance protein TehB	tehB
P66907	Queuine tRNA-ribosyltransferase	tgt
A0A0H2UP75	Phosphomethylpyrimidine kinase	thiD
Q97RE1	Probable tRNA sulfurtransferase	thiI
Q97RS6	Hydroxyethylthiazole kinase 1	thiM1
P0A3L7	Homoserine kinase	thrB
A0A0H2US33	Threonine synthase	thrC
Q97PI4	Threonine--tRNA ligase	thrS
P67049	Thymidylate synthase	thyA
Q97SG9	Trigger factor	tig
P22976	Probable transketolase	tkt
A0A0H2US23	Transketolase, C-terminal subunit	tktC
A0A0H2US62	Transketolase, N-terminal subunit	tktN
Q97R91	Thymidylate kinase	tmk
P66942	Triosephosphate isomerase	tpiA
P0C2J8	Probable thiol peroxidase	tpx
P67506	tRNA (guanine-N(7)-)-methyltransferase	trmB
Q97RM4	tRNA (guanine-N(1)-)-methyltransferase	trmD
Q97R84	Methylenetetrahydrofolate--tRNA-(uracil-5-)-methyltransferase TrmFO	trmFO
Q97P33	Tryptophan synthase alpha chain	trpA
Q97P30	Indole-3-glycerol phosphate synthase	trpC
A0A0H2URN1	Anthranilate synthase component I	trpE
P67595	Tryptophan--tRNA ligase	trpS
Q97QJ3	tRNA pseudouridine synthase B	truB
A0A0H2URA9	Thioredoxin	trx
A0A0H2UQN9	Thioredoxin reductase	trxB
Q97T27	tRNA N6-adenosine threonylcarbamoyltransferase	tsaD
P0A3B7	Elongation factor Ts	tsf
P64030	Elongation factor Tu	tuf
A0A0H2UQS5	Prephenate dehydrogenase	tyrA
Q97NE3	Tyrosine--tRNA ligase	tyrS
P67413	Uridine kinase	udk
P23379	Uracil-DNA glycosylase	ung
Q97RQ3	Uracil phosphoribosyltransferase	upp
Q97SR4	Isoprenyl transferase	uppS
A0A0H2US70	Secreted 45 kd protein	usp45
Q97S45	Valine--tRNA ligase	valS
A0A0H2UP16	ABC transporter, ATP-binding protein Vexp2	vex2
A0A0H2UP51	Transmembrane protein Vexp3	vex3
A0A0H2US94	Preprotein translocase, YajC subunit	yajC-2
Q97R63	Endoribonuclease YbeY	ybeY
A0A0H2UMR5	Ribosome-binding ATPase YchF	ychF
A0A0H2US65	Ribosomal subunit interface protein	yfiA
Q97NP5	Membrane protein insertase YidC 1	yidC1
A0A0H2URB8	YlmE protein	ylmE
Q9L7Q2	Zinc metalloprotease ZmpB	zmpB
O54537	Glucose-6-phosphate 1-dehydrogenase	zwf

## Sheet: Table S2
Supplementary Table 2: . Significant changes in ∆cadA protein expression compared to TIGR4.
Accession Number	Description	Gene	ΔcadA/TIGR4	Fisher's Exact Test (P-Value)
A0A0H2UPT5	Iron-compound ABC transporter	fhuD	-50	< 0.00010
A0A0H2UPS5	Aspartate-semialdehyde dehydrogenase	asd	-25	< 0.00010
A0A0H2UPL6	Saccharopine dehydrogenase	lys9	-25	< 0.00010
P18791	Oligopeptide-binding protein	oppA	-25	< 0.00010
P63957	D-alanine--poly(phosphoribitol) ligase subunit 2	dltC	-11.1111	< 0.00010
Q97R25	4-hydroxy-tetrahydrodipicolinate synthase	dapA	-10	< 0.00010
A0A0H2UPT3	N-carbamoylputrescine amidase	SP_0922	-10	0.0001
A0A0H2URS4	Aminotransferase, class I	SP_1994	-10	< 0.00010
A0A0H2XFA2	Lysozyme	lytC	-5	0.00014
A0A0H2UPS0	Carboxynorspermidine decarboxylase	nspC	-5	0.032
A0A0H2URJ7	Sugar ABC transporter, sugar-binding protein	rafE	-5	0.053
Q97S61	Ribosome maturation factor RimP	rimP	-5	0.019
Q97QU4	50S ribosomal protein L21	rplU	-5	0.032
A0A0H2UPW9	Glycosyl transferase, group 1	SP_1076	-5	0.011
A0A0H2URS6	Putative dextran glucosidase DexS	SP_1883	-5	< 0.00010
A0A0H2USB7	Uncharacterized protein	SP_2209	-5	0.032
A0A0H2UQT1	Alpha-amylase	amy	-3.33333	0.053
A0A0H2URT4	Sucrose phosphorylase	gtfA	-3.33333	0.053
Q97RS9	Lysine--tRNA ligase	lysS	-3.33333	0.008
Q97RW5	tRNA dimethylallyltransferase	miaA	-3.33333	0.053
Q97PX3	Pyridoxal 5'-phosphate synthase subunit PdxT	pdxT	-3.33333	0.053
Q97Q34	Phosphate import ATP-binding protein PstB 2	pstB2	-3.33333	0.017
P67684	Putative ribosome biogenesis GTPase RsgA	rsgA	-3.33333	0.053
A0A0H2UNE6	Cof family protein	SP_0286	-3.33333	0.011
A0A0H2URC5	Uncharacterized protein	SP_1793	-3.33333	< 0.00010
A0A0H2URU7	Uncharacterized protein	SP_2045	-3.33333	0.053
A0A0H2US37	ABC transporter, ATP-binding/permease protein	SP_2073	-3.33333	0.0031
A0A0H2URS9	Catabolite control protein A	ccpA	-2.5	0.0042
P63895	4-hydroxy-tetrahydrodipicolinate reductase	dapB	-2.5	0.014
P14677	Penicillin-binding protein 2x	pbp2X	-2.5	0.024
A0A0H2URK8	Trehalose PTS system, IIABC components	SP_1884	-2.5	< 0.00010
Q97NE7	N-acetyldiaminopimelate deacetylase	SP_2096	-2.5	0.046
A0A0H2US65	Ribosomal subunit interface protein	yfiA	-2.5	0.036
Q97R16	Serine hydroxymethyltransferase	glyA	-2	< 0.00010
A0A0H2UQJ0	Choline kinase	pck	-2	0.031
P65241	Ribose-phosphate pyrophosphokinase 2	prs2	-2	0.0039
A0A0H2UMX9	Conserved domain protein	SP_0097	-2	< 0.00010
A0A0H2UMY5	Uncharacterized protein	SP_0098	-2	0.00055
A0A0H2UN46	MccC family protein	SP_0182	-2	0.018
Q97NE6	2,3,4,5-tetrahydropyridine-2,6-dicarboxylate N-acetyltransferase	dapH	-1.66667	0.003
Q97R46	Bifunctional protein GlmU	glmU	-1.66667	0.0017
A0A0H2UP66	Lactate oxidase	lctO-2	-1.66667	< 0.00010
A0A0H2UR69	Hydroxymethylglutaryl-CoA synthase	mvaS	-1.66667	0.012
P18766	Oligopeptide transport ATP-binding protein	oppB	-1.66667	0.017
P0A4M7	Oligopeptide transport system permease protein	oppF	-1.66667	0.011
Q97QX6	Phosphoenolpyruvate carboxylase	ppc	-1.66667	0.00079
A0A0H2UP36	Uncharacterized protein	SP_0670	-1.66667	< 0.00010
A0A0H2UPF3	Lipoprotein	SP_0845	-1.66667	< 0.00010
O54537	Glucose-6-phosphate 1-dehydrogenase	zwf	-1.66667	0.0033
P63413	Acetate kinase	ackA	-1.42857	0.038
Q54796	Glucan 1,6-alpha-glucosidase	dexB	-1.42857	0.048
Q97PW6	Glycine--tRNA ligase beta subunit	glyS	-1.42857	0.0087
A0A0H2UPG3	Glutathione reductase	gor	-1.42857	0.034
Q97NF1	Glycerol-3-phosphate dehydrogenase [NAD(P)+]	gpsA	-1.42857	0.051
Q97NC9	Histidine--tRNA ligase	hisS	-1.42857	0.021
A0A0H2UQH0	Homoserine dehydrogenase	hom	-1.42857	0.033
P65536	Nucleoside diphosphate kinase	ndk	-1.42857	0.051
P0A2U8	Oligopeptide transport ATP-binding protein	oppD	-1.42857	0.024
Q97PX2	Pyridoxal 5'-phosphate synthase subunit PdxS	pdxS	-1.42857	0.046
A0A0H2URN4	Glutamyl-aminopeptidase	pepA	-1.42857	0.00027
A0A0H2UNE1	Aminopeptidase C	pepC	-1.42857	< 0.00010
Q97S34	Phenylalanine--tRNA ligase beta subunit	pheT	-1.42857	0.015
P65239	Ribose-phosphate pyrophosphokinase 1	prs1	-1.42857	0.036
Q97ST4	UPF0210 protein SP_0239	SP_0239	-1.42857	0.024
A0A0H2UQG0	Amidohydrolase family protein	SP_1356	-1.42857	0.038
A0A0H2UQW7	Oxidoreductase, pyridine nucleotide-disulfide, class I	SP_1588	-1.42857	< 0.00010
P22976	Probable transketolase	tkt	-1.42857	< 0.00010
Q97Q48	Alanine--tRNA ligase	alaS	-1.25	0.025
O69076	ATP-dependent zinc metalloprotease FtsH	ftsH	-1.25	0.054
A0A0H2UQY4	UDP-glucose 4-epimerase	galE-1	-1.25	0.031
Q97SQ9	Glutamine--fructose-6-phosphate aminotransferase [isomerizing]	glmS	-1.25	0.0041
P64297	GMP synthase [glutamine-hydrolyzing]	guaA	-1.25	0.018
P0A3M9	L-lactate dehydrogenase	ldh	-1.25	< 0.00010
P29849	Maltodextrin phosphorylase	malP	-1.25	0.03
Q97RC8	Xaa-Pro dipeptidyl-peptidase	pepX	-1.25	0.036
A0A0H2UNL5	Formate acetyltransferase	pfl	-1.25	0.036
P0C2J9	Pneumolysin	ply	-1.25	0.028
Q97R51	Foldase protein PrsA	prsA	-1.25	0.017
A0A0H2UNS2	Uncharacterized protein	SP_0443	-1.25	0.054
A0A0H2UP44	Elongation factor Tu family protein	SP_0681	-1.25	0.047
Q97SU1	Adenylate kinase	adk	1.3	0.043
A0A0H2UNF8	Capsular polysaccharide biosynthesis protein Cps4J	cap4J	1.3	0.0035
Q97SJ6	Capsular polysaccharide biosynthesis protein CpsC	cpsC	1.3	0.053
A0A0H2UN99	PTS system, mannose-specific IIAB components	manL	1.3	0.0056
Q97QL3	Tagatose 1,6-diphosphate aldolase	lacD	1.4	0.037
A0A0H2URV3	N-acetylglucosamine-6-phosphate deacetylase	nagA	1.4	0.032
A0A0H2UPY6	Putative pullulanase	SP_1118	1.4	0.033
A0A0H2UQW0	Non-heme iron-containing ferritin	SP_1572	1.4	< 0.00010
Q97RQ6	DegV domain-containing protein SP_0742	SP_0742	1.5	0.026
A0A0H2URX2	Alcohol dehydrogenase, zinc-containing	SP_2055	1.5	< 0.00010
A0A0H2US28	Uncharacterized protein	SP_2132	1.5	0.046
Q97PM1	GTP-sensing transcriptional pleiotropic repressor CodY	codY	1.6	0.035
A0A0H2UQC6	Flavodoxin	fld	1.6	0.016
P35592	Oligopeptide-binding protein AliA	aliA	1.7	< 0.00010
P95829	Chaperone protein DnaK	dnaK	1.7	< 0.00010
Q97Q31	Phosphate-binding protein PstS 1	pstS1	1.7	0.013
A0A0H2UQW6	Sugar ABC transporter, ATP-binding protein	msmK	1.8	0.00022
A0A0H2UNE3	Protein translocase subunit SecY	secY	1.8	0.0034
P35597	Probable cation-transporting ATPase exp7	exp7	1.9	0.011
P65159	Dihydroxy-acid dehydratase	ilvD	1.9	< 0.00010
Q97QL1	Galactose-6-phosphate isomerase subunit LacB	lacB	2.1	0.00066
Q97Q16	Glucosamine-6-phosphate deaminase	nagB	2.1	0.018
A0A0H2UQ78	Uncharacterized protein	SP_1230	2.1	0.017
A0A0H2UR34	Isochorismatase family protein	SP_1583	2.2	0.032
A0A0H2UP17	Putative PTS system, IIB component	SP_0646	2.3	0.0025
A0A0H2UQP9	Putative oxidoreductase	SP_1471	2.3	0.048
P0A4G2	Manganese ABC transporter substrate-binding lipoprotein	psaA	2.4	< 0.00010
P65121	Translation initiation factor IF-1	infA	2.6	0.023
A0A0H2UNM7	Cell wall surface anchor family protein	SP_0463	2.8	< 0.00010
A0A0H2UNT6	Cell wall surface anchor family protein	SP_0462	3.1	0.033
A0A0H2UPM4	Pyrimidine-nucleoside phosphorylase	pyn	3.2	0.0066
A0A0H2US53	DltD protein	dltD	3.4	0.0024
A0A0H2UQN8	Putative oxidoreductase	SP_1472	3.4	0.0077
A0A0H2URT5	Penicillin-binding protein 2A	pbp2A	3.8	0.00041
Q97R22	Thymidine kinase	tdk	5.3	0.012
A0A0H2UR84	Manganese ABC transporter, ATP-binding protein	psaB	6.8	< 0.00010
A0A0H2USC9	Phosphate transport system permease protein	pstC	7	0.0022
A0A0H2URG7	Glycosyltransferase Gtf1	gtf1	7.1	0.0022
A0A0H2UPR0 [2]	Cluster of Uncharacterized protein	SP_1003	7.5	< 0.00010
A0A0H2UR93	Uncharacterized protein	SP_1768	8.5	0.00039
A0A0H2UMU8	PTS system, IIB component	SP_0061	11	< 0.00010
A0A0H2UMY0	ABC transporter, substrate-binding protein	SP_0092	18	< 0.00010
A0A0H2UP55	Serine protease, subtilase family	SP_0641	19	< 0.00010
A0A0H2UQ34	Phosphocarrier protein HPr	ptsH	21	< 0.00010
A0A0H2US11	Ascorbate specific PTS, EIIC component	sgaT2	31	< 0.00010
A0A0H2USF7	Ascorbate specific PTS, EIIB component	sgaB2	33	< 0.00010
P0A2V8	Phosphate import ATP-binding protein PstB 3	pstB3	36	< 0.00010
P0C2M5	Phosphate-binding protein PstS 2	pstS2	41	< 0.00010
P0A3Y7	Phosphate-specific transport system accessory protein PhoU homolog	phoU	43	< 0.00010
A0A0H2US62	Transketolase, N-terminal subunit	tktN	46	< 0.00010
A0A0H2US23	Transketolase, C-terminal subunit	tktC	67	< 0.00010
A0A0H2URY8	Transcriptional regulator, BglG family	SP_2131	84	< 0.00010
